1

2

## Cerebellar acceleration of learning in an evidence-accumulation task

3

4

Marlies Oostland<sup>1,†,\*</sup>, Mikhail Kislin<sup>1</sup>, Yuhang Chen<sup>1</sup>, Tiffany Chen<sup>2</sup>,

5

Sarah Jo Venditto<sup>1</sup>, Ben Deverett<sup>3</sup>, Samuel S.-H. Wang<sup>1,\*</sup>

6

7

<sup>1</sup>Neuroscience Institute, Princeton University, Princeton, NJ, USA.

8

<sup>2</sup>Department of Neurological Surgery, University of California, San Francisco, CA, USA.

9

<sup>3</sup>Department of Anesthesiology, Stanford University Medical Center, Stanford, CA, USA.

10

11

<sup>†</sup>Present address: Wolfson Institute for Biomedical Research, University College London,  
London, UK.

13

14

\*Correspondence: [sswang@princeton.edu](mailto:sswang@princeton.edu) (SW), [m.oostland@ucl.ac.uk](mailto:m.oostland@ucl.ac.uk) (MO)

15

## 16 Abstract

17 **Perturbation to the cerebellum can lead to motor dysfunction, cognitive deficits, and**  
18 **behavioral inflexibility. Here we report that a cerebellum-specific transgenic mouse model**  
19 **with disrupted Purkinje cell function shows unexpectedly accelerated learning on a sensory**  
20 **evidence-accumulation task, as well as enhanced sensory reactivity to touch and auditory**  
21 **cues. Computational latent-state analysis of behavior revealed that accelerated learning was**  
22 **associated with enhanced focus on current over past trials. Learning was also accelerated by**  
23 **providing cue-locked optogenetic stimulation of Purkinje cells, but unaffected by continuous**  
24 **optogenetic interference with Purkinje cell activity. Both transgenic and optogenetically-**  
25 **boosted mice showed prolonged electrophysiological activity in Purkinje-cell complex spikes**  
26 **and anterior cingulate cortex. We suggest that cerebellar activity may shape evidence-**  
27 **accumulation learning by enhancing task focus and neocortical processing of current**  
28 **experience.**

29  
30

## 31 Introduction

32 The cerebellum's roles extend beyond movement to include cognition, sensory processing,  
33 learning, and memory (Carta et al., 2019; Hatten, 2020; Heijden et al., 2021). Recent  
34 neuroimaging, clinical, and animal research provides evidence for a cerebellar role in social  
35 cognition and adaptive prediction (Frosch et al., 2022; Ito, 2006; Stoodley and Tsai, 2021), and in  
36 mice, cerebellar disruption can lead to deficits in attention, behavioral flexibility, and social  
37 interaction (Badura et al., 2018). Functional effects can be long-lasting, since early-life cerebellar  
38 injury in humans leads to autism spectrum disorder and other nonmotor disabilities (Garfinkle et  
39 al., 2020; Küper and Timmann, 2013; Limperopoulos et al., 2007; Tsai et al., 2018; Wang et al.,  
40 2014).

41 Here, we present evidence for enhanced function in cerebellum-specific functional  
42 perturbations. To examine alterations in task performance that emerge from abnormal cerebellar  
43 circuits, we examined *L7-Tsc1* mutants, a mouse model in which *tuberous sclerosis complex 1* is  
44 deleted specifically in cerebellar Purkinje cells (Kloth et al., 2015; Tsai et al., 2012), as well as  
45 acute optogenetic perturbations of cerebellar activity. Our findings indicate that the cerebellum  
46 regulates sensory reactivity at brainwide scale to regulate task persistence and learning.

## 47 Results

48 *L7-Tsc1* mutant mice have moderately reduced numbers of Purkinje cells (Figure 1A,B),  
 49 and surviving Purkinje cells show lower firing rates both *ex vivo* (Tsai et al., 2012) and *in vivo*,  
 50 with reduced simple-spike and complex-spike rates in awake animals (Figure 1C). *L7-Tsc1* mutant  
 51 mice show perseveration and deficits in gait and social interactions, as well as deficits in relatively  
 52 simple motor learning on the accelerating rotarod (Kloth et al., 2015; Tsai et al., 2012). We found  
 53 that mutant mice were slower to learn a separate delay tactile startle conditioning behavior (DTSC)  
 54 (Yamada et al., 2019) (Figure 1D), a cerebellum-dependent form of associative sensorimotor  
 55 conditioning (Chen et al., 2022).

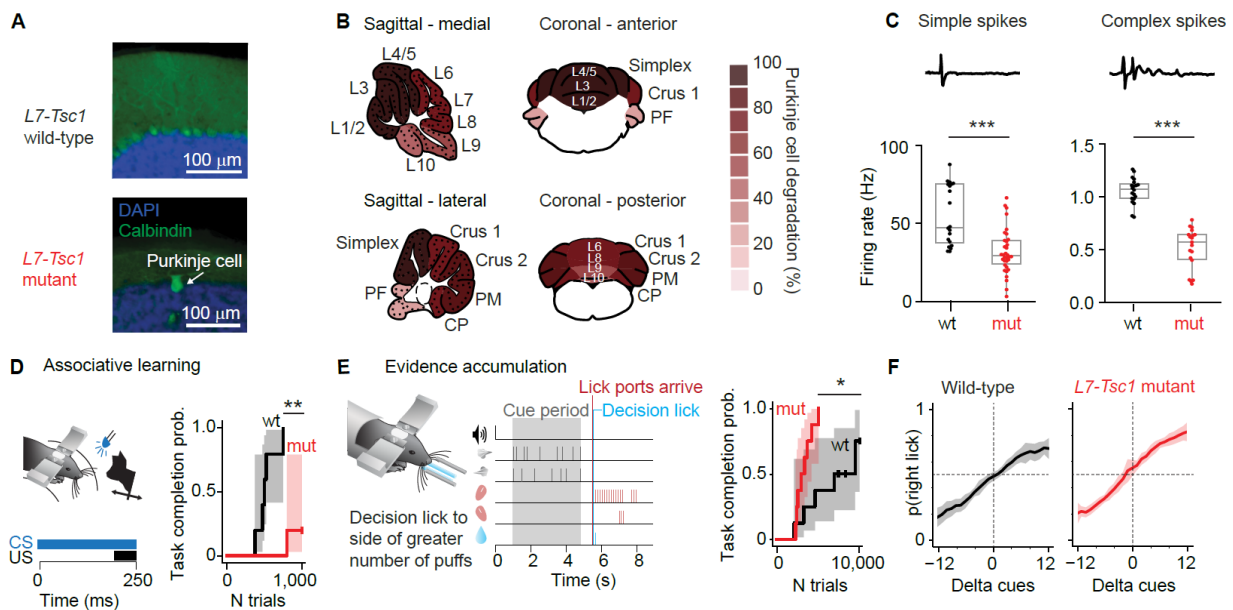

56

### 57 Figure 1 Cerebellar-impaired mice show enhanced learning of an evidence-accumulation 58 decision-making task

59 (A) *L7-Tsc1* mutant mice have reduced number of Purkinje cells in the cerebellar cortex. (B)  
 60 Schematic of sagittal and coronal views of the cerebellum with quantification of Purkinje cell  
 61 loss averaged over 4 *L7-Tsc1* mutant mice at 5-6 months old for each cerebellar lobule,  
 62 normalized to 3 wild-type littermates. (C) Reduced spontaneous *in vivo* firing rates of simple  
 63 spikes and complex spikes in *L7-Tsc1* mutant mice (simple spikes:  $n = 34$  cells, mean = 32 Hz,  
 64 complex spikes:  $n = 19$  cells from 4 mice, mean = 0.51 Hz) compared to wild-type littermates  
 65 (simple spikes:  $n = 20$  cells, mean = 55 Hz,  $t(1) = 5.06$ ,  $p = 5.5 \times 10^{-6}$ , complex spikes:  $n = 20$   
 66 cells from 5 mice, mean = 1.05 Hz,  $t(1) = 10.55$ ,  $p = 1.1 \times 10^{-12}$ , both two-sided Student's  $t$ -  
 67 tests). Example waveforms above each plot are 15 ms. (D) Impaired learning of the delayed  
 68 tactile startle conditioning task for *L7-Tsc1* mutant mice ( $n = 5$ , median 1000 trials) compared to  
 69 wild-type littermates ( $n = 5$ , median 500 trials,  $\chi^2(1) = 9.70$ ,  $p = 0.0018$ , log-rank test). (E) Left:  
 70 the evidence-accumulation task. Mice receive sensory airpuffs on the left and right whiskers, and  
 71 receive a reward for correctly licking in the direction of more puffs. Right: Kaplan-Meier

72 estimator of probability of reaching the final level of task training for *L7-Tsc1* mutant mice ( $n =$   
73 8, median 3410 trials) and wild-type littermates ( $n = 8$ , median 9636 trials,  $\chi^2(1) = 6.49$ ,  $p =$   
74 0.011, log-rank test). Shaded areas in Kaplan-Meier curves represent 95% confidence intervals.  
75 (F) Psychometric performance curves in mice who recently reached the final level show no  
76 detectable change in bias ( $t(1) = 1.73$ ,  $p = 0.21$ ), slope ( $t(1) = 0.15$ ,  $p = 0.70$ ), or lapse rate ( $t(1) =$   
77 3.44,  $p = 0.085$ , all two-sided Student's  $t$ -tests). Shading represents 1 s.d.

78  
79

## 80 **Enhanced learning and sensory responses**

81 We examined more complex forms of learning and information processing by training mice  
82 to integrate sensory evidence in working memory using an established evidence-accumulation  
83 decision-making paradigm (Deverett et al., 2018; Pinto et al., 2018). Post-learning performance of  
84 this task depends on cerebellar crus I (Deverett et al., 2018, 2019), a region that is also necessary  
85 for other nonmotor functions (Badura et al., 2018) and where *L7-Tsc1* mutants have reductions in  
86 Purkinje cells (Figure 1B). During the task, mice receive sensory airpuffs on the left and right  
87 whiskers, and receive a reward for correctly licking in the direction of more puffs (Figure 1E).  
88 Mice progress through increasingly difficult levels of task shaping, during which evidence  
89 becomes more complex and an increasing temporal delay separates sensory information from the  
90 decision (Table S1).

91 We were surprised to find that *L7-Tsc1* mutant mice showed enhanced learning  
92 capabilities, successfully reaching the final level of training twice as quickly as wild-type  
93 littermates (Figure 1E). The faster learning rate was not correlated with sex, age, or corticosterone  
94 level. Faster learning already occurred at the earliest stages of training (Figure S1). Once animals  
95 had reached the expert stage, in the first few sessions at the final level there was no difference in  
96 overall performance between *L7-Tsc1* mutant mice and their wild-type littermates (Figure 1F; no  
97 significant difference in percentage correct trials:  $p=0.53$ , Welch's  $t$ -test, one-tailed; no significant  
98 difference in the slope parameter of the psychometric curve,  $p=0.31$ ; no significant difference in  
99 the linear regression for slope for -5 to +5 range of cue difference,  $p=0.11$ ). Mutant mice also did  
100 not differ from wildtypes in the number of licks per trial, either in correct trials ( $p=0.45$ , two-tailed  
101  $t$ -test) or incorrect trials ( $p=0.23$ ). Final performance is comparable to animals who have been  
102 trained extensively at the final level of a similar task (Deverett et al., 2018, 2019; Pinto et al.,  
103 2018).

104

## 105 **Mutants stay on-task and in the present**

106 To further explore the alterations in behavior associated with accelerated learning, we  
107 performed computational latent-state analysis of the learning process throughout training (Figure  
108 2). Latent-state analysis identifies shifts in behavioral response patterns occurring between groups  
109 of trials that reveal variations in internal states over time (Ashwood et al., 2022; Bolkan et al.,  
110 2022; Calhoun et al., 2019). We fitted trial-by-trial outcomes to a generalized linear model - hidden  
111 Markov model (GLM-HMM, Figure 2A), trained on a separate data set of 22 wild-type mice and  
112 then fitted to the experimental animals (Figure 2B).

113 Based on these fits, mouse behavior could be sorted into three major categories that differed  
114 in their dependence on task parameters (Figure 2B). Mice in the on-task state 1 made the most  
115 correct decisions, relying heavily on the left-right difference in sensory cues, and less on the  
116 animals' choice in the previous trial. Early in training, wild-type mice tended to spend time in state  
117 2, a past-trial-driven state in which mice relied more heavily on past rather than present  
118 information, thus reducing their decision accuracy, with responses strongly dependent on the  
119 choices made in the previous two trials; and state 3, an inattentive state in which mice were only  
120 weakly sensitive to any features of the task. On a moment-to-moment basis, wild-type mice made  
121 transitions from state to state on the time scale of dozens or hundreds of trials (Figure 2C). Each  
122 of these states had a distinct psychometric performance curve (Figure 2D) and dependency on past  
123 trials (Figure 2E) that were consistent with fit parameters. Within sessions, transitions away from  
124 state 1 occurred largely at the end of a session, when animals typically switched from the on-task  
125 state to the disengaged state (see example in Figure 2F).

126 Across sessions as training progressed, animals gradually shifted away from state 2 or 3  
127 occupancy, eventually reaching consistent state 1 occupancy (Figure 2G,H,I). This shift in state  
128 occupancy occurred in all animals, and took more trials for slower learners (examples in Figure  
129 2G). To measure how this difference in occupancy evolved over training, we divided the  
130 behavioral data into two stages of task shaping: early, during which the animals still receive hint  
131 puffs to guide their choice, and late, during which animals need to accumulate the evidence in  
132 progressively more difficult trials. *L7-Tsc1* mutant mice already had higher state 1 occupancy than  
133 wild-type mice at the earliest stages of training, and this increased occupancy continued throughout  
134 the late stages (Figure 2I and Figure S1A). The shape of the psychometric curves of *L7-Tsc1*  
135 mutant mice in each state was similar to their wild-type littermates (Figure S2A,B).

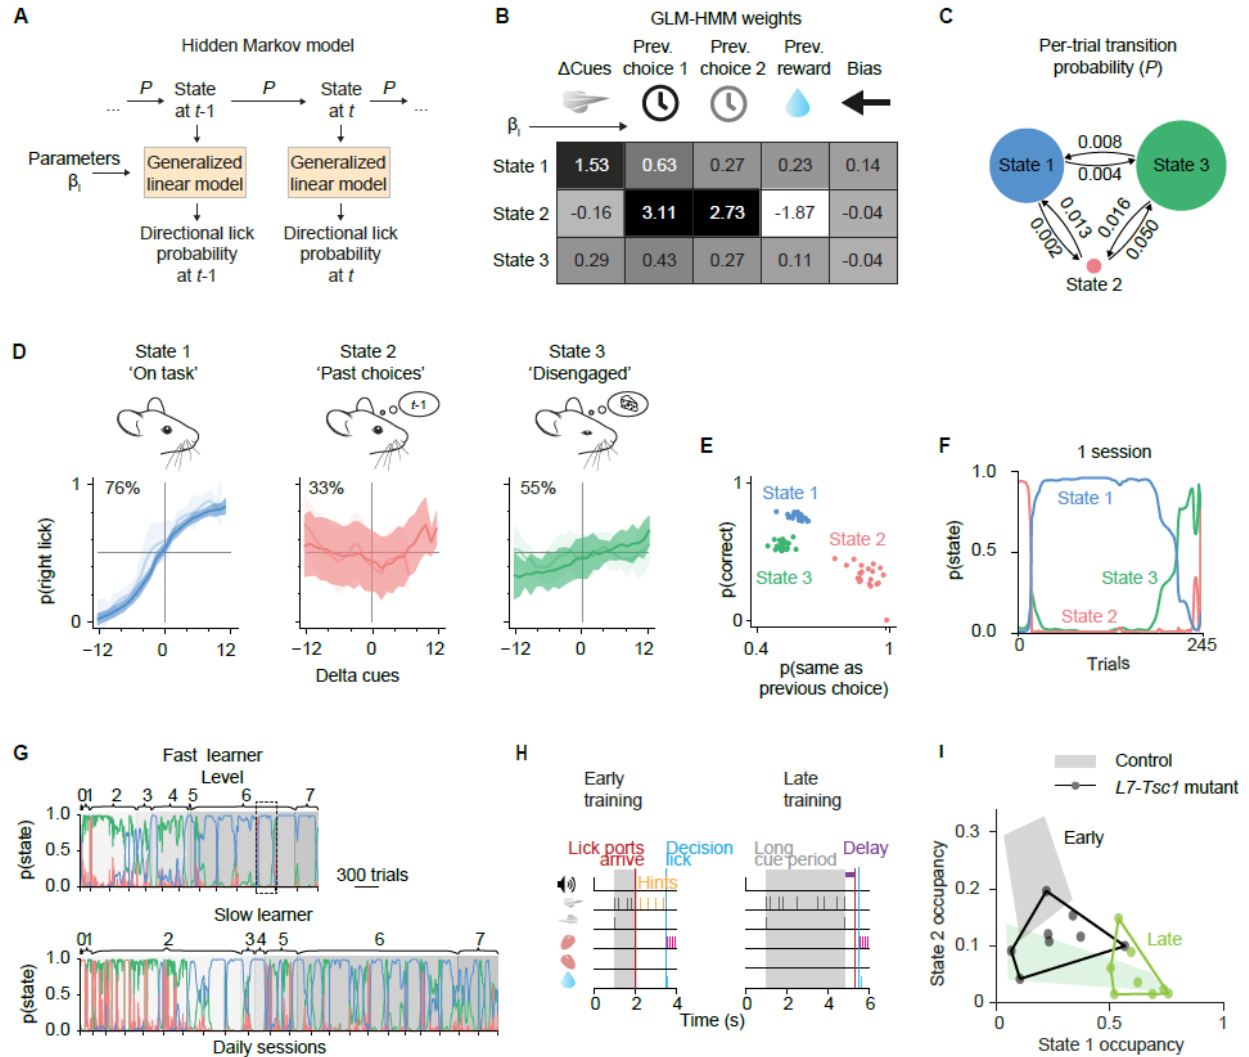

136

137 **Figure 2 Latent behavioral-state analysis of task learning shows increased on-task focus in**  
 138 **faster learners with cerebellar manipulations**

139 (A) Schematic illustrating the GLM-HMM.  $P$  is state transition probability. (B) Inferred GLM-  
 140 HMM weights from the training data set. (C) Per-trial transition rate between the three states  
 141 averaged over all mice. The size of the circles indicate state occupancy across all trials of the mice  
 142 in the training data set. (D) Psychometric curves averaged across all mice. In the top left is the  
 143 percentage correct over all trials in that state. Shaded areas represent one s.d. Lighter curves  
 144 indicate early trials and darker curves indicate late trials (see panel H). (E) Probability of a correct  
 145 choice against the probability that the choice in the current trial was the same as the choice in the  
 146 previous trial. Each data point represents the average across all trials for one mouse. (F) Posterior  
 147 state probabilities for one example session. (G) Posterior state probabilities for all trials in all  
 148 sessions from a fast learner (top) and a slow learner (bottom). The dashed area in the top panel  
 149 indicates the session in F. (H) Two different stages of the evidence-accumulation task. (I) State 1  
 150 and state 2 occupancy during early and late stages for *L7-Tsc1* animals. Each data point represents  
 151 one mouse. Shaded areas indicate the area covered by control animals.  
 152



153 **Enhanced sensory reactivity is accompanied by increased neocortical response**

154 Because simple associative conditioning was not improved in *L7-Tsc1* mice and because  
155 evidence-accumulation learning was faster even at the onset of training, we hypothesized that the  
156 accelerated learning rate might be related to specific processing steps that come subsequent to  
157 airpuff presentation. We therefore measured sensory reactivity before training. Naive *L7-Tsc1*  
158 mutant mice showed enhanced blink responses to individual airpuffs (Figure 3A), as well as to  
159 auditory stimuli (Figure S3A,B), indicative of altered sensory processing. In wild-type C57BL/6J  
160 mice, increasing the intensity of airpuffs from 10 psi to 20 psi was sufficient to accelerate training  
161 to a degree similar to that seen in *L7-Tsc1* mutant mice (Figure 3B), and increased the degree of  
162 state-1 occupancy in the earliest stages of training at which the puff intensity increase occurred,  
163 but not without any perturbation (Figure 3C, Figure S4A,B and Figure S1C). This suggests that  
164 pre-existing sensory reactivity may aid in high-accuracy performance during learning of a task  
165 requiring integration of sensory evidence, such as the evidence-accumulation task.

166 To measure neural signals accompanying enhanced sensory responsiveness, we performed  
167 *in vivo* electrophysiological recordings in crus I in naive mice (Figure 3D), a time when improved  
168 learning was already evident at early stages of training. In wild-type mice, sensory cues triggered  
169 complex spikes (Figure 3E,F), with a delayed simple-spike response (Figure 3G). In contrast, in  
170 *L7-Tsc1* mutant mice, complex spikes were activated only after a delay of several hundred  
171 milliseconds (Figure 3F), with decreased simple-spike response (Figure 3G) and the consequent  
172 expected disinhibition of negative feedback from deep nuclei (Figure S5A) onto inferior olivary  
173 neurons (Kim et al., 2020; Llinas, 2014).

174 Influences of cerebellum may be conveyed via long-range connections that project  
175 throughout thalamus and neocortex (Pisano et al., 2021), including two associative regions  
176 implicated in decision-making (Chabrol et al., 2019; Gao et al., 2018; Kennerley et al., 2006) that  
177 receive substantial disynaptic input from crus I (Pisano et al., 2021): anterior cingulate (Figure 3H)  
178 and anterolateral motor cortex (Figure S5B). Recordings from these regions showed an  
179 enhancement in cue-evoked activity with a similar time course as complex-spike activity. These  
180 effects were not seen in the barrel field of the primary somatosensory cortex (Figure S5C). These  
181 results suggest that cerebellar neural activity might play a causal role in influencing neocortical  
182 activity to drive learning.

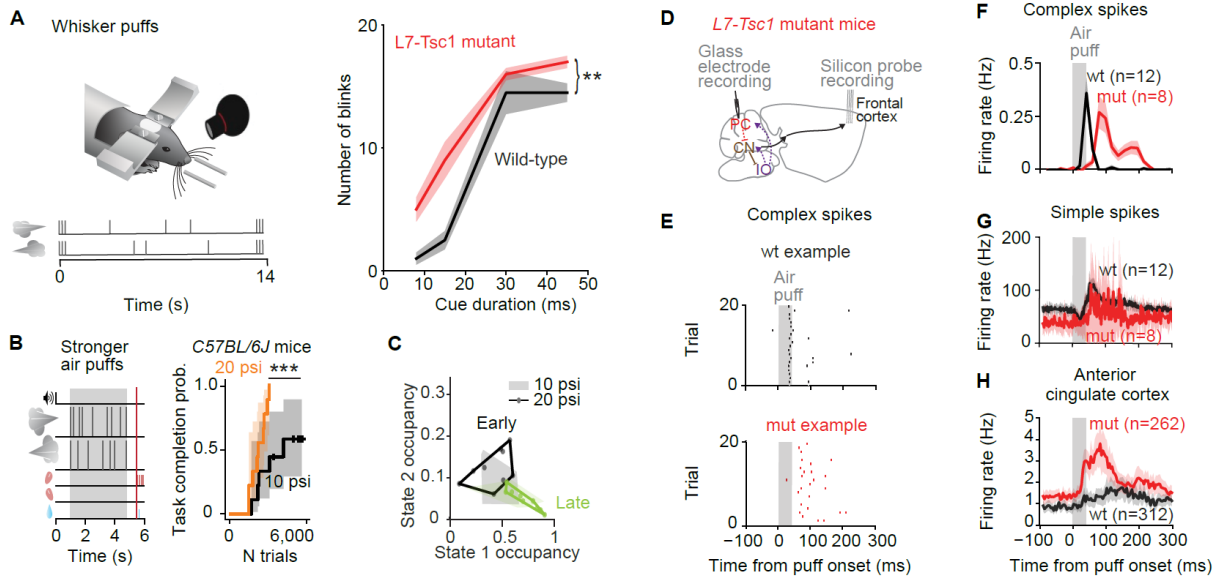

183  
184  
185  
186  
187  
188  
189  
190  
191  
192  
193  
194  
195  
196  
197  
198  
199  
200  
201  
202  
203  
204

### Figure 3 Prolonged whisker puff responses in awake behaving *L7-Tsc1* mice in cerebellar complex spikes and forebrain

(A) Left: schematic of sensory sensitivity test with bilateral and unilateral whisker puffs. Right: median number of eye blinks in response to whisker puffs of different durations for *L7-Tsc1* mutant mice ( $n = 16$ ) and wild-type littermates ( $n = 7$ ). A two-way ANOVA indicates an effect of genotype ( $F = 7.44, p = 0.008$ ), as well as whisker puff duration ( $F = 32.80, p = 3.9 \times 10^{-14}$ ), but no interaction effect ( $F = 0.98, p = 0.4$ ). Shaded areas indicate the estimated s.e.m. using median absolute deviation. (B) Increased sensory salience through stronger puffs also leads to enhanced learning. Kaplan-Meier estimator of task completion for C57BL/6J animals receiving standard (10 psi,  $n = 9$ , median 4275 trials) or stronger (20 psi,  $n = 9$ , median 2225 trials) whisker puffs during the evidence accumulation task ( $\chi^2(1) = 7.11, p = 0.00047$ , log-rank test). Shaded areas in Kaplan-Meier curves represent 95% confidence intervals. (C) State 1 and state 2 occupancy during early and late stages for mice with standard or stronger whisker puffs. Each data point represents one mouse. Shaded areas indicate the area covered by control animals. (D) Recording sites in cerebellum-neocortical path of influence in whisker puff responses in *L7-Tsc1* mutant mice. (E) Example raster plots of Purkinje cell complex spikes during 20 trials from one wild-type animal (top) and one *L7-Tsc1* mutant animal (bottom). (F-H) Average firing rates in response to an air puff to the whiskers (data from 4 *L7-Tsc1* mutants and 5 wild-type mice) for Purkinje cell complex spikes (F), Purkinje cell simple spikes (G) and for anterior cingulate cortex (H). Shaded areas represent 95% confidence intervals.



## 205 **Optogenetic replication of fast learning**

206 In *L7-Tsc1* mutant mice, Purkinje cell function is altered chronically. To determine whether  
207 enhanced learning could arise from acute perturbation, we directly manipulated neural activity in  
208 wild-type mice by expressing the optogenetic probe channelrhodopsin-2 in Purkinje cells (Figure  
209 4). We optogenetically reinforced each cue, starting after mice had passed out of the early stage of  
210 training, by pairing each sensory stimulus with an ipsilateral light flash (cue-locked “opto-  
211 boosting”) applied over crus I (Figure 4A). Opto-boosting led to faster learning than in controls  
212 not expressing ChR2 (Figure 4A). Furthermore, mice showed an immediate tendency toward  
213 increased occupancy of on-task state 1 and reduced occupancy of prior-trial state 2 (Figure S1B).  
214 Specifically, 4 out of 5 optogenetically-reinforced mice spent more than 90% of the trials in state  
215 1 and fewer than 5% of the trials in state 2 (Figure 4B). This tendency continued all the way  
216 through late training.

217 Cerebellum-driven acceleration of learning might arise from enhancement of immediate  
218 cue experience, or alternately require longitudinal shaping across sessions. Opto-boosting did not  
219 increase the number of blinks produced to individual airpuffs in a sensory reactivity test (within-  
220 mouse comparison; 25 psi puffs of 8-45 ms duration,  $F(2,48)=0.23$ ,  $p=0.80$  for opto-boosting vs.  
221 no boosting, linear mixed-effect model, 5 mice), consistent with a mechanism in which Purkinje  
222 cell simple-spike suppression, which is required for eyelid closure (Romano et al., 2018), occurs  
223 in *L7-Tsc1* mutant mice but not with opto-boosting. The amount of per-puff whisker movement in  
224 the evidence-accumulation task was also not affected by optogenetic boosting (Figure 4C, rise:  
225  $p=0.27$ , decay:  $p=0.53$ , two-tailed Welch’s *t*-test,  $n=5$  ChR- mice and  $n=6$  ChR+ mice), indicating  
226 that the accelerated learning which occurs both in the *L7-Tsc1* mutant mice and with optogenetic  
227 boosting does not covary with immediate sensorimotor processing.

228 In trained mice, when Purkinje cells in crus I are optogenetically stimulated continuously  
229 during the entire cue period and delay period including the first lick (Figure S6A), performance is  
230 impaired by forgetting immediately-past experience (Deverett et al., 2019). However, the amount  
231 of per-puff whisker movement in the evidence-accumulation task was not affected (Figure S6D,  
232 rise:  $p=0.61$ , decay:  $p=0.33$ , two-tailed Welch’s *t*-test,  $n=5$  ChR- mice and  $n=6$  ChR+ mice). Even  
233 though such continuous stimulation increased overall simple-spike activity, it did not enhance  
234 simple-spike responses to individual sensory cues, and there was no change in complex spike firing  
235 in response to whisker puffs (Figure S6E,F) and no detectable effect on the learning rate (Figure

236 S6B) or whisker puff responses in forebrain areas (Figure S6G,I,J). At levels with optogenetic  
237 stimulation, there was no change in state 1 occupancy, although there was a reduction in state 2  
238 occupancy (Figure S6C and Figure S1D). Thus, under all conditions that accelerated learning,  
239 reduction in state-2 occupancy was visible at the earliest stages of perturbation (Figure S1).

240 After training, optogenetic stimuli delivered without sensory cues could also drive  
241 decision-making above chance (Figure 4D), suggesting that alterations in Purkinje cell activity  
242 could target effectors in common with sensory cues. Thus learning can be augmented by boosting  
243 Purkinje cell activity during sensory stimulation, either via *Tsc1* knockout or by optogenetic  
244 activation, both of which generate similar alterations of complex spike timing and neocortical  
245 activity.

246 Behavioral results were consistent with the similarity in complex spike and neocortical  
247 activity patterns compared to *L7-Tsc1* mutant mice. *In vivo* recordings in awake behaving naive  
248 ChR2-expressing mice (Figure 4E) indeed showed an increase in simple-spike firing during the  
249 air puff paired with optogenetic boosting (Figure 4H), the opposite of the effect seen in *L7-Tsc1*  
250 mutant mice. On the other hand, complex spike firing was increased and delayed (Figure 4F,G), a  
251 similar effect to that seen in *L7-Tsc1* mutant mice, due to a putatively disinhibitory effect of  
252 simple-spike firing on nucleo-olivary paths (Bengtsson and Hesslow, 2006). Firing enhancement  
253 coincided with the end of the optogenetic stimulus (Figure S7), consistent with a disinhibitory  
254 effect. Furthermore, silicon probe recordings in neocortex showed enhancements in associative  
255 anterior cingulate (Figure 4I) and anterolateral motor region (Figure S7B) activity, but not in the  
256 barrel field of the primary somatosensory cortex (Figure S7C), mimicking neocortical activity in  
257 *L7-Tsc1* mutant mice.

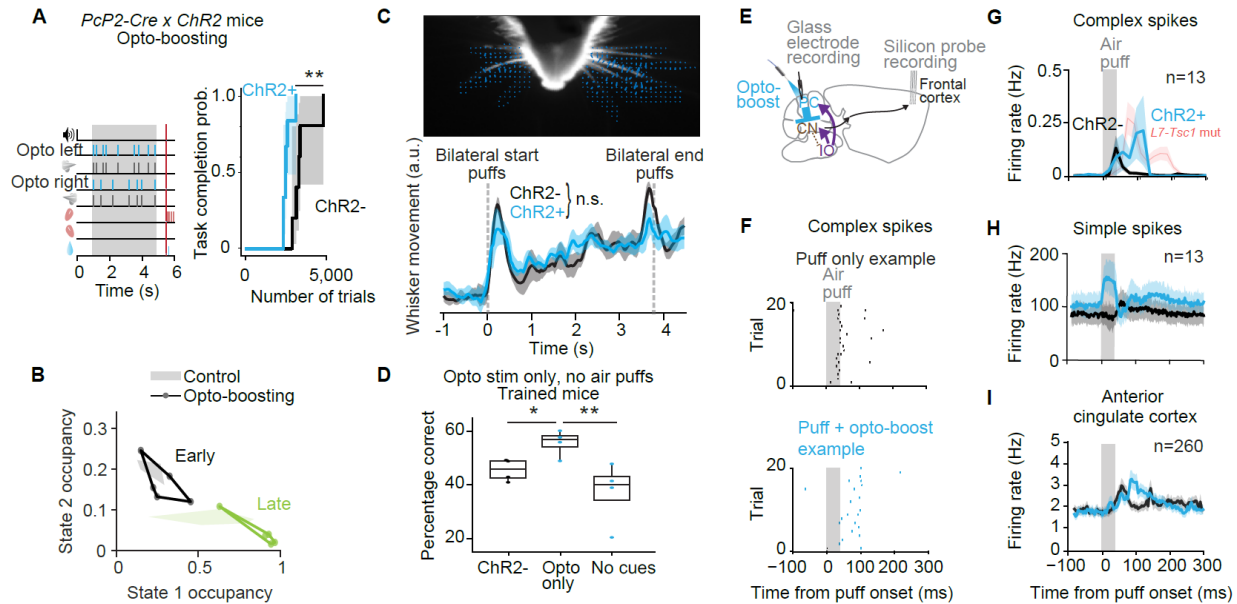

258

259 **Figure 4 Altered whisker puff responses and faster learning with cue-locked optogenetic**  
 260 **boosting of Purkinje cells**

261 (A) Schematic and Kaplan-Meier estimator of task completion probability for *Pcp2-Cre* × *ChR2*  
 262 mice with cue-locked bilateral optogenetic activation of crus I in the evidence-accumulation task  
 263 ( $n = 6$ , median 2512 trials) and wild-type littermates ( $n = 5$ , median 3311 trials,  $\chi^2(1) = 8.18$ ,  $p =$   
 264  $0.0042$ , log-rank test). (B) State 1 and state 2 occupancy during early and late stages for mice  
 265 with or without opto-boosting of whisker puffs. Each data point represents one mouse. Shaded  
 266 areas indicate the area covered by control animals. (C) Detection of whisker movement during  
 267 the evidence-accumulation task in response to bilateral whisker puffs at the start and end of each  
 268 trial. Blue arrows in the top plot indicate detection of whisker movement measured using a  
 269 region-of-interest optical flow analysis. Shaded areas in the bottom plot include 95% confidence  
 270 intervals. (D) Performance in the evidence-accumulation task in trained *Pcp2-Cre* × *ChR2* mice  
 271 with only cue-locked optogenetic activation of Purkinje cells in crus I ( $n = 4$ , mean percentage  
 272 correct: 55.8%), and two controls without stimuli: one without ChR2 expression ( $n = 4$ , 45.6%  
 273 correct), the other without light ( $n = 4$ , 37.2% correct). Overall effect:  $H(2) = 7.65$ ,  $p = 0.022$   
 274 (Kruskal-Wallis test), with significant differences between ChR2+ and ChR2- mice ( $p = 0.046$ ,  
 275 Conover post-hoc test) and ChR2+ and no cues ( $p = 0.0044$ ). Due to anti-biasing parameters,  
 276 chance level different for each animal but always below 50%. (E) Recording sites in cerebellum-  
 277 neocortical path of influence in whisker puff responses paired with optogenetic boosting of  
 278 Purkinje cells in crus I. (F) Example raster plots of Purkinje cell complex spikes during 20 trials  
 279 with only a whisker puff (top) or with a whisker puff paired with optogenetic stimulation  
 280 (bottom). (G-I) Average firing rates in response to an air puff to the whiskers for Purkinje cell  
 281 complex spikes (G, data from 4 mice), Purkinje cell simple spikes (H, data from same 4 mice)  
 282 and for anterior cingulate cortex (I, data from 3 mice). The red line in G indicates the firing rate  
 283 for *L7-Tsc1* mutant mice (Figure 3F) for comparison. Shaded areas represent 95% confidence  
 284 intervals.

285

## 286 **Discussion**

287 Our experiments support the idea that cerebellar complex-spike output can accelerate  
288 nonmotor learning through increased on-task focus. Cerebellar activity is transmitted to  
289 neocortical structures via major paths through thalamus and other midbrain structures (Fujita et  
290 al., 2020; Pisano et al., 2021) that may convey these influences. Among the extensive neocortical  
291 targets of cerebellar projections is the parietal cortex, where, interestingly, silencing of activity  
292 was recently shown to improve performance in evidence accumulation by reducing reliance on  
293 past evidence (Akrami et al., 2018). Cerebellum and neocortex project to one another  
294 bidirectionally in a loopwise manner via thalamus, pons, and midbrain structures (Strick et al.,  
295 2009; Wagner and Luo, 2020), including distributed influence of lobules over diverse associative  
296 and premotor regions (Pisano et al., 2021). Such connectivity provides a substrate for delayed  
297 activation and spatially distributed responses. Indeed, in *L7-Tsc1* mutant mice, inhibition of the  
298 medial prefrontal cortex has previously been found to improve social deficits and repetitive  
299 behaviors (Kelly et al., 2020). In addition, it has recently been found that transcranial direct current  
300 stimulation of the right lateral posterior cerebellum improved performance on a sentence  
301 completion task, as well as altering activity in multiple neocortical regions (Rice et al., 2021).

302

### 303 **The cerebellum and global coherence**

304 The convergence of impaired associative motor learning, increased sensory sensitivity, and  
305 accelerated task learning through increased task focus (Figure 5) echoes traits found in autism  
306 spectrum disorder (ASD). ASD is associated with islands of enhanced function, including  
307 perceptual domains and technical or even artistic capacities (Happé and Frith, 2006; Mottron et  
308 al., 2006). According to the weak central coherence account of ASD, these enhanced capacities  
309 can be explained by a detail-focused cognitive style in which individual perceptual features are  
310 emphasized. In the global coherence account of autism spectrum disorder, the capacity to extract  
311 global form and meaning is displaced by superiority on local or detail-focused processing (Happé  
312 and Frith, 2006). Our findings with cerebellar perturbations demonstrate one aspect of such  
313 processing, sensory hypersensitivity (Mottron et al., 2006), and an association with accelerated  
314 capacity to learn a sensory-integration task. Our results also show one predicted feature of such  
315 increased sensitivity, hyperreactivity of neocortical circuits (Markram and Markram, 2010). The  
316 atypicalities of sensation and perception reported in ASD can be interpreted in terms of a

317 broadening of Bayesian priors about the sensory world. “Hypo-priors” can account for a tendency  
318 among autistic persons “to perceive the world more accurately rather than [be] modulated by prior  
319 experience” (Pellicano and Burr, 2012). Cerebellar disruption provides one neural substrate for  
320 hypo-prior formation, providing a substrate for a seemingly paradoxical phenomenon seen in ASD:  
321 broad disruption of cognitive and social function, accompanied by high performance in specific  
322 skill domains (Happé and Frith, 2006).  
323

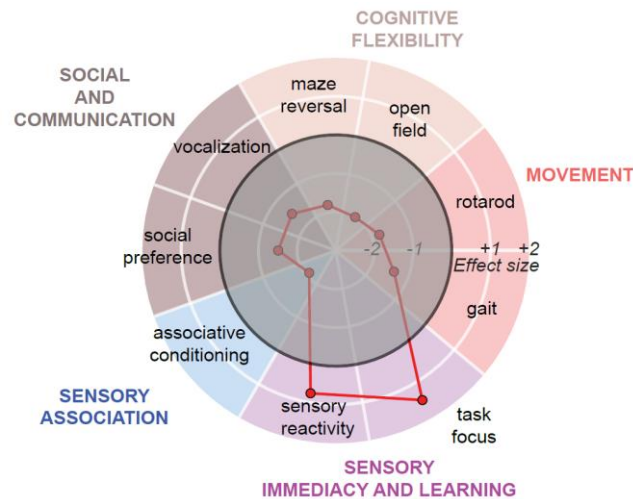

324  
325 **Figure 5 *L7-Tsc1* mutant mice express an island of enhanced sensory reactivity and task**  
326 **focus amid a variety of impairments**  
327 Each dot represents an estimated effect size (Cohen’s *d*) for the behavior of *L7-Tsc1* mutant mice  
328 compared to their wild-type littermates. The thick circle indicates typical behavior (effect size 0).  
329 Based on data presented in this paper and from Tsai et al. 2012; Kloth et al. 2015; Klibaite et al.  
330 2022.  
331

332 **Acknowledgements**

333 We thank members of the Wang lab, the BRAIN CoGS consortium, and Michael Häusser for  
334 discussion and advice, G. Joseph Broussard, Caroline Jung, Junuk Lee, Laura Lynch, Dafina  
335 Pacuku, and John Wuethrich for help with experiments, Jonathan Pillow for advice on latent-state  
336 analysis, Zahra Dhanerawala, Austin Hoag, and Sanjeev Janarthanan from the BRAIN CoGS  
337 Histology Core for brain clearing, imaging and probe localization, and Carlos Brody, Sabine  
338 Kastner, Manuel Schottdorf and Thomas Zhihao Luo for comments on the manuscript. The work  
339 was supported by National Institutes of Health grants R01 NS045193, R01 MH115750, and U19  
340 NS104648 to SW, and European Union's Horizon 2020 research and innovation programme under  
341 the Marie Skłodowska-Curie grant agreement No 844318 to MO.

342

343 **Author contributions**

344 S.W. and M.O. conceptualized the research. M.O., S.W., M.K. and B.D. designed the experiments.  
345 M.O., M.K. and T.C. performed the experiments. M.O. and Y.C. did data analysis and  
346 visualization. S.J.V. provided the code for the GLM-HMM analysis. M.O. and S.W. did funding  
347 acquisition, project administration, and supervision. S.W. and M.O. wrote the original draft, and  
348 M.O. and B.D. reviewed and edited the paper.

349

350 **Declaration of interests**

351 Authors declare no competing interests.

352

353



354 **Methods**

355

356 **Mice.** Experimental procedures were approved by the Princeton University Institutional Animal  
357 Care and Use Committee (protocol 1943-19) and performed in accordance with the animal welfare  
358 guidelines of the National Institutes of Health and in line with the European Directive 2010/63/EU  
359 on the protection of animals used for experimental purposes.

360 Data came from 133 mice (males and females, 2-5 months of age at the start of  
361 experiments) of genotypes C57BL/6J (The Jackson Laboratory, Bar Harbor, ME, 40 animals),  
362 *Pcp2-Cre* for Purkinje-cell specificity and *Ai27D* for channelrhodopsin-2 (33 animals *Pcp2-Cre* ×  
363 *Ai27D*, acquired from The Jackson Laboratory, stock #010536 (RRID:IMSR\_JAX:010536) and  
364 #012567 (RRID:IMSR\_JAX:012567), respectively) and  $L7^{Cre};Tsc1^{flox/flox}$  mice (60 animals). To  
365 create these Purkinje cell specific  $L7^{Cre};Tsc1^{flox/flox}$  mice,  $Tsc1^{flox/flox}$  ( $Tsc1^{tm1Djk}/J$ , The Jackson  
366 Laboratory stock #005680) mutant mice were crossed into L7-Cre mice (B6.129-Tg(*Pcp2-*  
367 *cre*)2Mpin/J, The Jackson Laboratory, stock #004146). Experimenters were blinded to the  
368 genotypes of the mice for the duration of the behavioral experiments.

369 All mice were group-housed in reverse light cycle to promote maximal performance during  
370 behavioral testing, which took time during the day. For long-term behavioral experiments, mice  
371 were housed in darkness in an enrichment box containing bedding, houses, wheels (Igloo and Fast-  
372 Trac; K3250/K3251; Bio-Serv; Flemington, NJ, USA), climbing chains, and play tubes during all  
373 experimental days. At other times, mice were housed in cages in the animal facility, in groups of  
374 2–4 mice per cage. During experiments in which water intake was restricted, mice received 1.0–  
375 1.5 mL of filtered water per day plus half of a mini yogurt drop (F7577; Bio-Serv; Flemington,  
376 NJ, USA), and body weight and condition was monitored daily. Mice always had *ad libitum* access  
377 to food pellets.

378

379 **Surgical procedures.** For all surgeries, mice were anesthetized with isoflurane (5% for induction,  
380 1.0–2.5% for maintenance), and were given buprenorphine (0.1 mg/kg body weight) and rimadyl  
381 (5 mg/kg body weight) after surgery and were given at least 5 days of recovery in their home cages  
382 before the start of experiments, except for acute *in vivo* electrophysiology experiments when the  
383 animals were allowed to recover for at least two hours between the craniotomy and the acute  
384 recordings.

385 For optogenetic experiments, a custom-machined titanium headplate (Dombeck et al.,  
386 2007) was cemented to the skull using dental cement (C and B Metabond, Parkell Inc.). Two ~500  
387  $\mu\text{m}$  diameter craniotomies were drilled over the cerebellum, one over each hemisphere, directly  
388 posterior to the lamboid suture and ~3.6mm lateral to the midline in either direction. Ferrule  
389 implants were constructed with 400- $\mu\text{m}$ -diameter optical fiber (Thorlabs FT400EMT) glued to  
390 1.25-mm OD stainless steel ferrules (Precision Fiber Products MM-FER2007-304-4500) using  
391 epoxy (Precision Fiber Products PFP 353ND). Ferrules were positioned over each craniotomy with  
392 the fiber tip at the surface of the dura mater, and Vetbond (3 M) was applied surrounding the  
393 exposed fiber. Dental cement was then applied to secure the ferrule to the skull. Implants were  
394 cleaned before each behavior session using a fiber optic cleaning kit (Thorlabs CKF).

395 For *in vivo* electrophysiology, a headplate was implanted as described above, and a 2 mm  
396 craniotomy was drilled over the area of interest and the dura removed. For recordings from  
397 neocortex, the following stereotaxic coordinates were used: anterior cingulate cortex: ML 0-0.5  
398 mm, AP 0.5-1.5 mm, DV 0.7-1.0 mm, anterolateral motor cortex: ML 1.5 mm, AP 2.5 mm, DV  
399 0.7-1.0 mm, and barrel field of the primary somatosensory cortex: ML 2.5 - 3.5 mm, AP -0.8 - -  
400 1.8 mm, DV 0.6-1.5 mm. Two stainless steel screws for ground and reference wires (000–120  
401 1/16 SL bind machine screws, Antrin Miniature Specialties) were inserted in the skull above the  
402 forebrain as far away from the craniotomy as possible. For cerebellar recordings, a small hole was  
403 drilled for a reference electrode in the interparietal bone at the midline. Craniotomies (0.5 mm by  
404 1–1.5 mm) were made next to intersection of interparietal and occipital bones and over the left and  
405 right lobule V and simplex for extracellular single-unit recordings. Craniotomies were covered  
406 with Kwik-Cast silicone adhesive (World Precision Instruments) until the time of the recording.

407  
408 **Behavior experiments.** Mice were trained to perform an evidence-accumulation decision-making  
409 task as described previously (Deverett et al., 2018; 2019). The behavioral apparatuses were  
410 controlled by custom-written Python software as published previously (Deverett et al., 2018)  
411 ([https://github.com/wanglabprinceton/accumulating\\_puffs](https://github.com/wanglabprinceton/accumulating_puffs)). Animals were trained for 1.5-9.0  
412 weeks, 7 days/week. Briefly, head-fixed mice were seated in a tube for daily 1 h behavioral  
413 sessions consisting of 200-300 trials. In each trial, independent streams of randomly timed 40 ms  
414 air puffs of 10 psi (unless otherwise indicated) with a minimum 200 ms interpuff interval were  
415 delivered to the left and right sides over the course of a 1.0-3.8-second cue period. After a delay

416 period of 200-800 ms, lick ports were advanced into the reach of the animal, and animals received  
417 a 4  $\mu$ l water reward when they licked to the side with the greater number of puffs. The animal's  
418 decision was interpreted as the side licked first, regardless of subsequent licks. Anti-biasing  
419 procedures (Deverett et al., 2018) result in chance levels being <50%. To increase motivation,  
420 restriction of water intake started at least 5 days before the start of training and continued  
421 throughout the whole training period.

422 Animals went through different levels of training (levels 0-6) to reach the final version of  
423 the task (level 7). Mice automatically proceeded to the next level once they reached pre-defined  
424 performance criteria (see Table S1 for details of each level as well as the performance criteria).  
425 The time it took an animal to learn the task was defined as the total number of trials to reach level  
426 7. Psychometric curves were fitted with the psychofit module ([https://github.com/cortex-](https://github.com/cortex-lab/psychofit)  
427 [lab/psychofit](https://github.com/cortex-lab/psychofit)).

428 Light for optogenetic stimulation during the evidence-accumulation task was delivered as  
429 described previously (Deverett et al., 2019). Cue-locked optogenetic activation occurred  
430 unilaterally, at the same side and time at an air puff, for a duration of 40 ms (generated by Master-  
431 8, A.M.P.I.). Continuous optogenetic activation occurred bilaterally with 5-ms pulses at 50 Hz  
432 throughout the entire cue period, delay period, and ended upon first lick contact. When optogenetic  
433 activation was used to manipulate the learning rate, the optogenetic activation only started from  
434 level 3, and at every trial from then on. When optogenetic activation was used to manipulate  
435 performance in trained mice, light was on in 20% of trials. In this case, analysis compares light-  
436 off and light-on trials only from behavioral sessions in which light was delivered.

437 For the delay tactile startle conditioning (DTSC) task (Yamada et al., 2019), mice learned  
438 to elicit a startle (backward) movement in response to an initially neutral conditioned stimulus  
439 (CS; 250 ms; 5mm 395-400nm UV Ultraviolet LED, EDGELEC) that was paired with a startle-  
440 eliciting unconditioned stimulus (US, 20 ms tactile stimulus on the nose by taping foam that was  
441 attached to the stepper motor shaft (High Torque Nema 17 Bipolar Stepper Motor 92oz.in/65Ncm  
442 2.1A Extruder Motor, Stepper Online); CS-US inter-stimulus interval, 200 ms).

443 For sensory sensitivity tests, naive animals were headfixed in a similar setup to the  
444 evidence-accumulation setup and received either whisker puffs or auditory cues. Animals were not  
445 trained nor expected to do anything in response to the sensory cues, and did not receive any rewards  
446 throughout the session. Animals received cues in sequences of in total 24 cues starting and ending

447 with three cues with 200 ms inter-cue interval, and in between those, cues at random intervals  
448 (ranging from 0.8 to 3.0 s). Animals first received a sequence with cue durations of 8 ms, followed  
449 by sequences with longer cue durations (15, 30, and 45 ms for whisker puffs, and 15, 30, 45, 90,  
450 180, 320, and 640 ms for auditory cues). Animals either received bilateral air puffs to the whiskers  
451 at 20-25 psi, or auditory cues at 12 kHz. During sensitivity tests with whisker puffs, white noise  
452 was on in the background throughout the experiment. To determine eye blink responses, movies  
453 of the right side of their face and body were acquired using two USB cameras (Playstation Eye),  
454 modified by removal of infrared filters and encasings. Images were acquired at 30 Hz with 320 ×  
455 240 pixel resolution. Illumination was provided by an infrared LED array (Yr.seasons 48-LED  
456 Illuminator Light CCTV 850 nm IR Infrared Night Vision). Air puffs were produced by activation  
457 of solenoids (NResearch, standard two-way normally closed isolation valve, 161T011) with input  
458 from an air source (ControlAir Type 850 Miniature Air Pressure Regulator). Air was delivered via  
459 two tubes custom-machined with uniform openings, and positioned parallel to one another, parallel  
460 to the anteroposterior axis of the animal, 10 mm apart mediolaterally and ~1 mm anterior to the  
461 nose of the animal. Auditory cues were delivered to the apparatus by a speaker (Sony Tweeter XS-  
462 H20S) mounted below the apparatus. Analysis of eye blinks was performed using FaceMap  
463 (<https://github.com/MouseLand/facemap>) with manual curation and further analysis in Python.

464  
465 ***In vivo electrophysiology.*** For acute recordings from awake behaving mice, animals were head-  
466 fixed over a freely rotating cylindrical treadmill and the craniotomy site was opened by removing  
467 the Kwik-Cast plug and then filled with saline. Recordings were performed using either silicon  
468 probes for neocortex or glass electrodes for cerebellum, as described below. Air puffs to the  
469 whiskers were delivered by a pressure injector system (Toohey Spritzer, Toohey, Fairfield, NJ,  
470 USA) which received signals from a signal generator (Master-8; AMPI) with an intensity of 20 psi  
471 and a frequency of 1 Hz, except for experiments with continuous optogenetic activation throughout  
472 the entire cue and delay period, when air puffs were delivered with a frequency of 0.2 Hz. Mice  
473 received unilateral air puffs ipsilaterally to the recording site for Purkinje cells, anterior cingulate  
474 cortex, and anterolateral motor cortex, and contralaterally to the recording site for cerebellar nuclei  
475 and the barrel field of the somatosensory cortex. For recordings with optogenetic stimulation, light  
476 onset started at the same time as the air puff for the duration of the air puff (40 ms) unless indicated

477 otherwise. In a subset of experiments (Figure S6D) light started at the same time as the air puff but  
478 remained on for longer (250 ms).

479 For neocortical recordings, a 64-channel silicon probe (Neuronexus, A4x16-5mm-50-200-  
480 177 or A2x32-Poly5-10mm-20s-200-100) covered in Vybrant™ CM-DiI Cell-Labeling Solution  
481 (V22888; Invitrogen) was slowly placed above the craniotomy and lowered into the brain using a  
482 motorized micromanipulator (MP-225; Sutter Instrument Co.). The silicon probes were connected  
483 to two amplifier boards (RHD2132, Intan Technologies) using a dual headstage adapter  
484 (RHD2000, Intan Technologies). Recordings were made using an Open Ephys acquisition board  
485 at a sampling rate of 30 kHz. High-pass filtering of the raw data at 300 Hz, common median  
486 referencing, and automatic spike sorting was achieved using Kilosort 2 (Pachitariu et al., 2016;  
487 <https://github.com/cortex-lab/Kilosort>). Spikes were further manually curated using the Phy GUI  
488 (<https://github.com/kwikteam/phy>).

489 Single-unit recordings of Purkinje neurons and cerebellar nuclei neurons were performed  
490 using borosilicate glass electrodes (1B100F-4, World Precision Instruments) with 1- to 2- $\mu$ m tips,  
491 short for Purkinje cells or very long gradual tapers for cerebellar nuclei cells, and 3 to 12 M $\Omega$   
492 impedance, fabricated on a pipette puller (P-2000, Sutter Instruments Co.) and filled with sterile  
493 saline. The electrode was lowered into the cerebellum using an electrode holder that was positioned  
494 at a 40 or 90° angle to the craniotomy and controlled by a motorized micromanipulator (MP-225;  
495 Sutter Instrument Co.). The obtained electrical signals were amplified with a CV-7B headstage  
496 and Multiclamp 700B amplifier, digitized at 10 kHz with a Digidata 1440A and acquired in  
497 pClamp (Axon Instruments, Molecular Devices) in parallel with transistor-transistor logic (TTL)  
498 pulses from a signal generator (Master-8; AMPI) and with signal from pressure injector system  
499 (Toohey Spritzer, Toohey, Fairfield, NJ, USA). Purkinje neurons were identified by the presence  
500 of complex spikes followed by a characteristic pause in simple spikes. The cerebellar nuclei  
501 contain a high density of neurons that are deeper than and well separated from cerebellar cortical  
502 layers, and show clear single unit spike activity. Spike detection was performed using custom code  
503 written in MATLAB 2019a.

504

505 **Histology.** Animals were anesthetized with an overdose of ketamine (400 mg/kg)/xylazine (50  
506 mg/kg) (i.p.) and transcardially perfused using a peristaltic pump with phosphate buffered saline  
507 (PBS) with 10 mg/ml heparin (Sigma H3149-100KU), followed by chilled 10% formalin (Fisher

508 Scientific). Brains were extracted from the skull after perfusion, postfixed overnight at 4°C,  
509 washed and stored in PBS at room temperature. To visualize the probe locations using the CM-DiI  
510 track, brains were cleared and imaged by the BRAIN CoGS histology core facility. All brains  
511 underwent the same abbreviated iDISCO+ clearing protocol as previously described (Pisano et al.,  
512 2021). In short, after an overnight fix in 4% PFA, brains were rinsed in PBS at room temperature  
513 for four 30 minute sessions. Immediately brains were dehydrated 1 hr at each ascending  
514 concentration of methanol (20, 40, 60, 80, 100, 100%) and placed overnight in methanol at room  
515 temperature. The next day, they were being placed in 66% dichloromethane (DCM)/33% methanol  
516 for 3 hrs at room temperature. Brains were cleared with 100% DCM for two 15 min steps then  
517 placed in 100% benzyl ether (DBE). Brains were kept in fresh DBE prior to imaging and after for  
518 long-term storage. Tissue was imaged using a light-sheet microscope (Ultramicroscope II,  
519 LaVision Biotec., Bielefeld, Germany).

520 For quantification of Purkinje cells, Purkinje cells were stained with calbindin. Animals  
521 were transcardially perfused as described above, and after postfixation were stored in PBS at 4°C  
522 until sectioning. Whole brain sagittal sections were cut at 90 µm and collected in 0.1 M PBS.  
523 Sections were processed for immunohistology by washing with PBS and incubating for 1 hr at  
524 room temperature in a blocking buffer (10% normal goat serum, 0.5% Triton in PBS) prior to a 2-  
525 day incubation at 4°C in PBS buffer containing 2% NGS, 0.4% Triton and the rabbit anti-  
526 calbindin-D-28K primary antibody (C7354; Sigma-Aldrich St. Louis, MO, USA; 1:1000).  
527 Sections were subsequently washed in PBS, incubated for 2 hr at room temperature in the PBS  
528 buffer with goat anti-rabbit Alexa Fluor 488-conjugated secondary antibody (A-11008; Thermo  
529 Fisher Scientific, MA, USA, Invitrogen; 1:400), mounted on glass slides and covered with  
530 Vectashield. Images were acquired on the epifluorescent microscope Hamamatsu Nanozoomer.  
531 Using NDP.view2 Plus software, individual lobules were identified and Purkinje cells were  
532 assigned to lobules for counting.

533  
534 **Corticosterone measurements.** Animals were food deprived for 12-24 hrs before blood  
535 collection. Immediately after receiving air puffs to whiskers at 20 - 25 psi in a headfixed setup for  
536 10-20 minutes, ~50 µl of blood was collected from the tail vein using a capillary tube, and then  
537 immediately disposed of in a heparin-coated 1.5 ml eppendorf tube. Samples were stored on wet  
538 ice for maximum 4 hours, after they were centrifuged for 10 mins at 4 °C at 3000 rpm. Of each



539 sample 2-10  $\mu$ l of plasma was collected, placed in new non-coated 1.5 ml eppendorf tubes and  
540 stored at -80 °C. For each animal, two duplicate samples of 1  $\mu$ l each were used to determine  
541 plasma corticosterone levels using the Corticosterone ELISA Kit (K014; Arbor Assays, Ann  
542 Arbor, MI, USA) according to the manufacturer's protocol. Plate reading was done using an  
543 Infinite 200Pro (Tecan Life Sciences, Morrisville, NC, USA) with i-control software. Results from  
544 both duplicates were averaged to get one final corticosterone measurement per animal.

545  
546 **Generalized linear model - hidden Markov model.** The generalized linear model - hidden  
547 Markov model (GLM-HMM) combines a set of Bernoulli GLMs with a hidden Markov model  
548 (Ashwood et al., 2022; Calhoun, Pillow, and Murthy, 2019; Bolkan et al., 2022). For each trial,  
549 the animal is modeled to have a latent state that governs its strategy to process information in order  
550 to make the binary choice of which side to lick. Each state corresponds to a specific GLM with a  
551 unique weight vector of input variables. Between trials, the transition matrix of HMM defines the  
552 probability to change from one state to another. The output of GLM-HMM in each trial is  
553 calculated as the probability of a Bernoulli response (i.e. the probability of a rightward lick) based  
554 on both the latent state of current trial and the input variables. Delta cues ( $\Delta$ cues) is the number of  
555 air puffs on the right side minus the number of air puffs on the left side. Guide air puffs ('hints')  
556 are included. Previous choice 1 is the animal's choice on the previous trial. Previous choice 2 is  
557 the animal's choice of the trial prior to the previous trial. Previous reward is the side of the reward  
558 on the previous trial. Bias is an offset constant in each state that represents the tendency to lick  
559 rightward independent of other input variables. The trials used to calculate the psychometric curve  
560 of a latent state are selected to have a posterior probability for that state larger than 0.8. The state  
561 occupancy of a certain state is calculated as the fraction of trials whose posterior state probabilities  
562 are greatest for that state. The model is trained with the data of 22 wild-type mice on the air puff  
563 evidence accumulation task and fitted using expectation-maximization algorithm with code  
564 adapted from [https://github.com/Brody-Lab/venditto\\_glm-hmm](https://github.com/Brody-Lab/venditto_glm-hmm).

565  
566 **Statistical analysis and presentation.** Statistical tests used are indicated throughout the text. All  
567 further analysis was done with custom-written code in Python 3 using Spyder  
568 (<https://www.spyder-ide.org/>), and R (<https://www.r-project.org/>) using RStudio

569 (<https://www.rstudio.com/>). For every figure, \* =  $p \leq 0.05$ , \*\* =  $p \leq 0.01$ , \*\*\* =  $P \leq 0.001$ . Box  
570 and whiskers show median/interquartile range, and 1.5x the interquartile range.

571

572 **Code and data availability.** Code used for data acquisition is available at  
573 [https://github.com/wanglabprinceton/accumulating\\_puffs](https://github.com/wanglabprinceton/accumulating_puffs). All data that support the findings of this  
574 study will be publicly available upon publication.

575

576 **Supplemental information**

577 Figure S1 - S7 and Supplementary Table 1 are available for this paper.

578

579 **Correspondence and requests for materials** should be addressed to SW or MO.

580

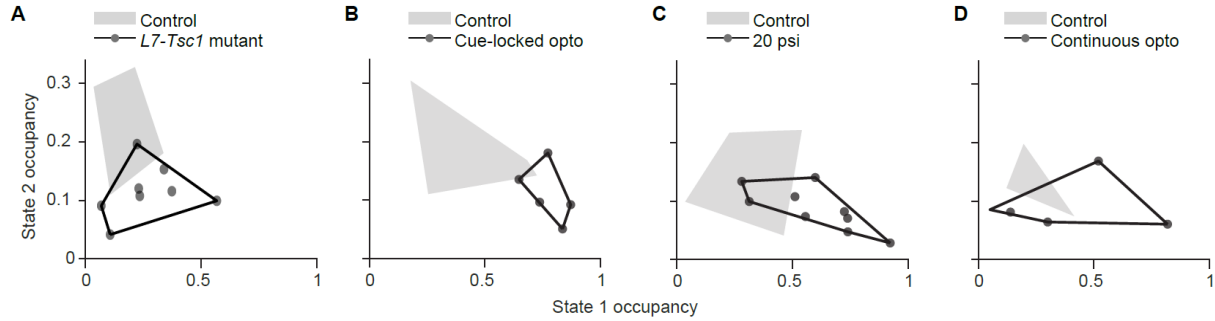

581

582 **Figure S1 Altered state occupancy occurs already at the earliest levels of manipulation**

583 (A) State occupancy at levels 0, 1, and 2 for *L7-Tsc1* mutant mice. (B) State occupancy at levels

584 3 and 4 for animals receiving cue-locked optogenetic stimulation of crus I. (C) State occupancy

585 at levels 3 and 4 for animals receiving stronger air puffs (20 psi) to the whiskers. (D) State

586 occupancy at levels 3 and 4 for animals receiving bilateral optogenetic stimulation of crus I

587 during the entire cue period, delay period, and first lick. Shaded areas indicate the area covered

588 by control animals.

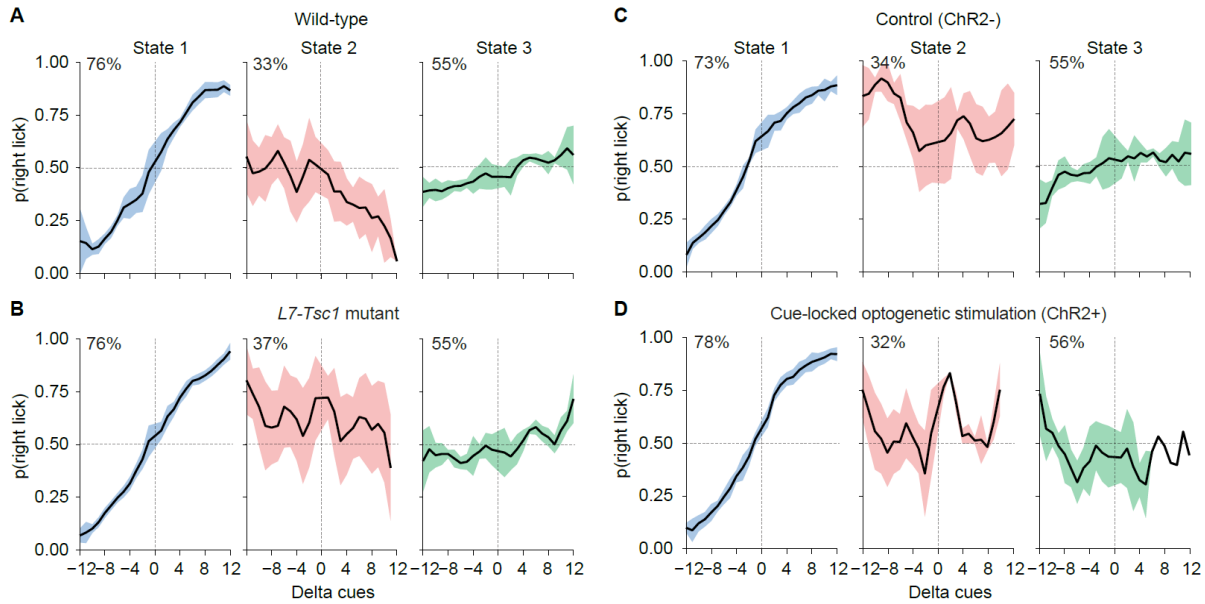

589

590 **Figure S2 Psychometric curves in the three states remain the same for *L7-Tsc1* mice and**  
591 **for mice receiving cue-locked optogenetic stimulation**

592 (A-D) Psychometric curves for the three states, averaged across all wild-type mice (A), *L7-Tsc1*  
593 mutant mice (B), ChR- mice (C) and ChR+ mice receiving cue-locked optogenetic stimulation of  
594 Purkinje cells in crus I (D). In the top left of each plot is the percentage correct over all trials in  
595 that state. Missing data points or data points without error bars indicate none or one animal at  
596 that data point due to low state occupancy. Shaded areas represent 1 s.d.

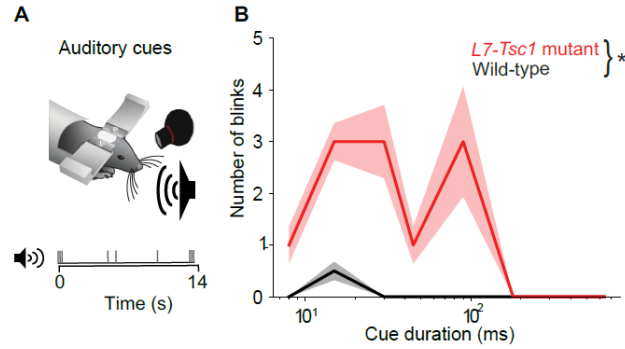

597

598 **Figure S3 Increased sensory sensitivity in *L7-Tsc1* mice**

599 (A) Schematic of sensory sensitivity tests with auditory cues. (B) Median number of eye blinks  
600 in response to auditory cues of different durations for *L7-Tsc1* mutant mice (n = 16) and wild-  
601 type littermates (n = 7). A two-way ANOVA indicates an effect of genotype (F = 5.06, P =  
602 0.026), but not of audio cue duration (F = 1.697, P = 0.11) or an interaction effect (F = 0.347, P  
603 = 0.93). Shaded areas indicate the estimated s.e.m. using median absolute deviation.

604



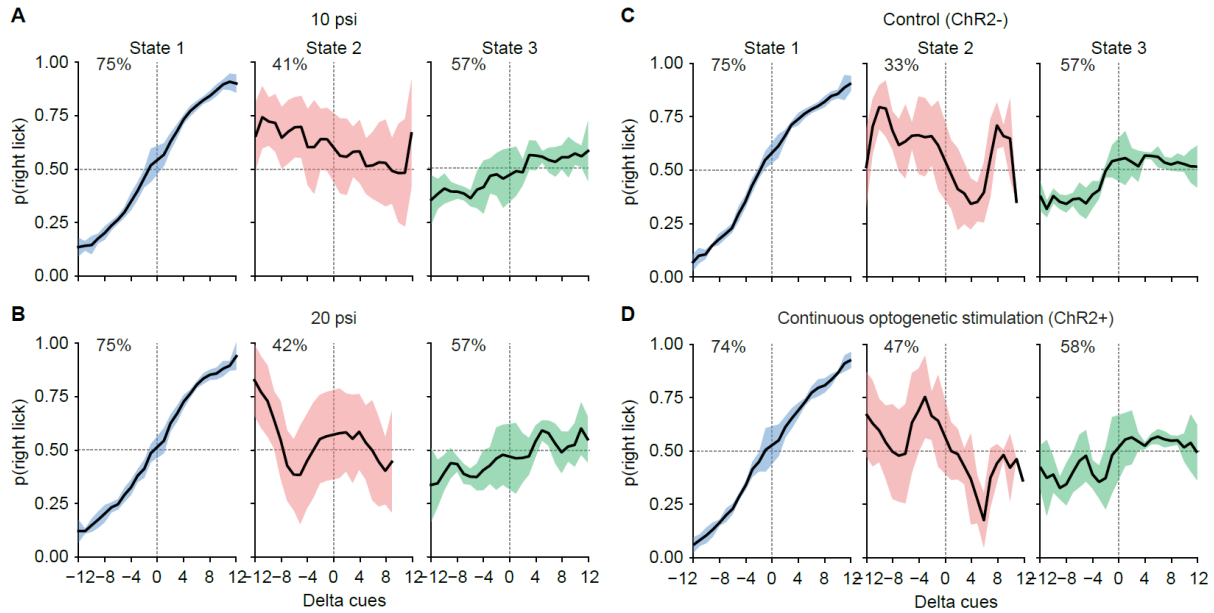

605

606

607

608

609

610

611

612

613

614

**Figure S4 Performance and state occupancy for animals receiving stronger whisker puffs or optogenetic stimulation of Purkinje cells in crus I throughout the entire cue period and delay period**

(A-D) Psychometric curves for the three states, averaged across all mice receiving air puffs to the whiskers of regular intensity (10 psi, A) or higher intensity (20 psi, B) or the normal task version for mice not expressing opsin (ChR2-, C) or for mice expressing opsin (ChR2+, D) and receiving continuous optogenetic stimulation to Purkinje cells in crus I during the cue period, delay period, and first lick. In the top left of each plot is the percentage correct over all trials in that state. Shaded areas represent one standard deviation.

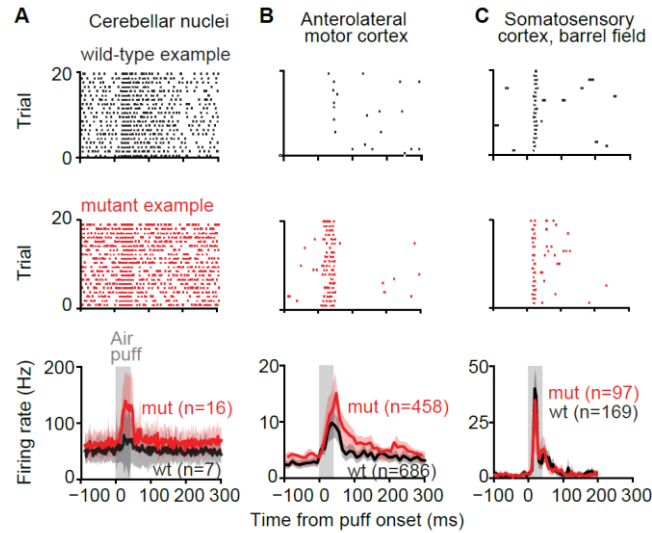

615

616 **Figure S5 Increased responses to whisker puffs in *L7-Tsc1* mice in cerebellar nuclei and**  
617 **anterolateral motor cortex, but not somatosensory cortex**

618 (A - C) Example raster plots of cerebellar nuclei cells (A), anterolateral motor cortex (B), and the  
619 barrel field of the primary somatosensory cortex (C) during 20 trials from *L7-Tsc1* mutants  
620 (middle) or their wild-type littermates (top), and average firing rates (bottom) in response to an  
621 air puff to the whiskers (data from the same 4 *L7-Tsc1* mutants and 5 wild-type mice as in Figure  
622 3). Shaded areas represent 95% confidence intervals.  
623

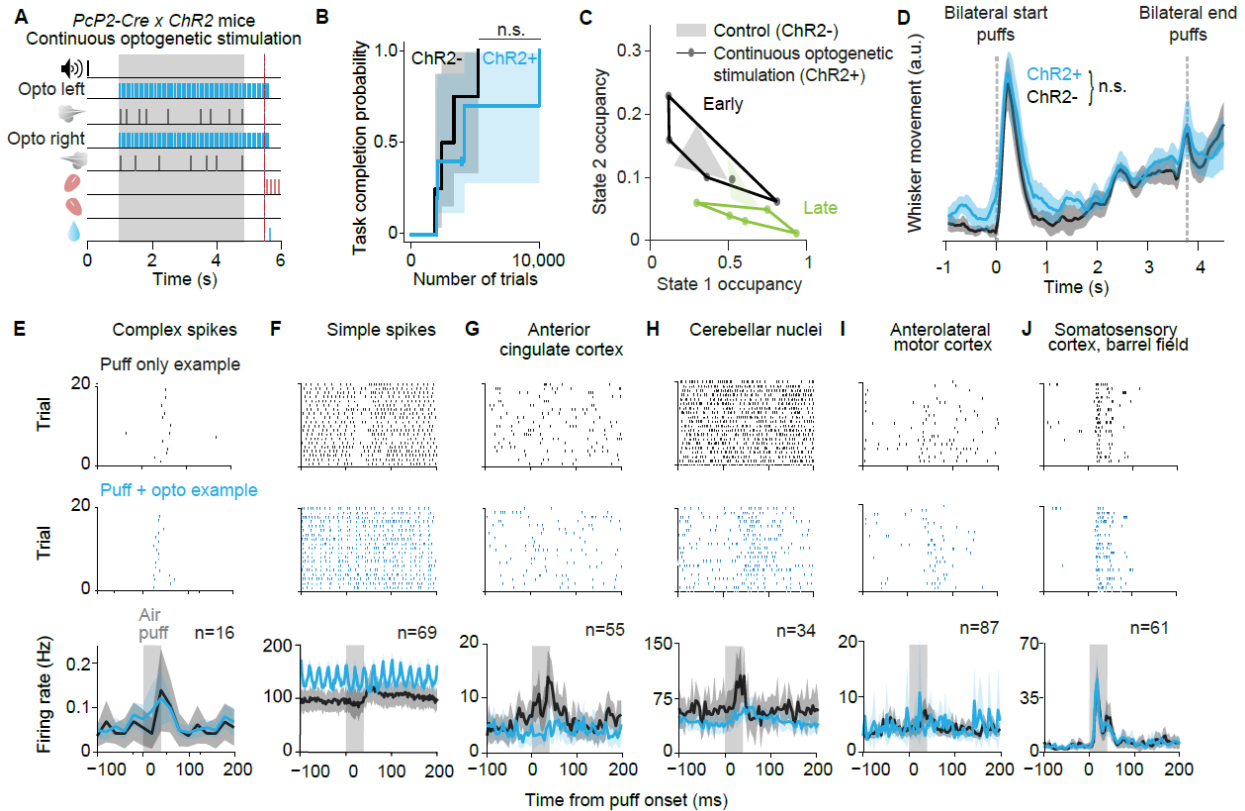

624

625 **Figure S6 No effect of continuous optogenetic activation of Purkinje cells in crus I on**  
 626 **learning of the evidence-accumulation task**

627 (A) Schematic of the evidence-accumulation task with continuous bilateral optogenetic  
 628 activation of crus I. (B) Kaplan-Meier estimator of task completion probability for *PcP2-Cre* ×  
 629 *ChR2* mice with continuous bilateral optogenetic activation of crus I throughout the evidence-  
 630 accumulation task ( $n = 5$ , median 4210 trials) compared to wild-type littermates ( $n = 4$ , median  
 631 2534 trials,  $\chi^2(1) = 0.31$ ,  $P = 0.33$ , log-rank test). (C) State occupancy for mice receiving  
 632 continuous optogenetic stimulation. Note that the manipulations did only occur in the late levels  
 633 of the task. Shaded areas indicate the area covered by control animals. (D) Whisker movement  
 634 during the evidence-accumulation task in response to bilateral whisker puffs at the start and end  
 635 of each trial. Shaded areas include 95% confidence intervals. (E-J) Example raster plots of:  
 636 Purkinje cell complex spikes (E), Purkinje cell simple spikes (F) anterior cingulate cortex (G),  
 637 cerebellar nuclei cells (H), anterolateral motor cortex (I), and the barrel field of the primary  
 638 somatosensory cortex (J) during 20 trials with only a whisker puff (top) or with a whisker puff  
 639 paired with discounting optogenetic stimulation (middle), and average firing rates in response to  
 640 an air puff to the whiskers with or without paired optogenetic stimulation of Purkinje cells.  
 641 Shaded areas represent 95% confidence intervals.

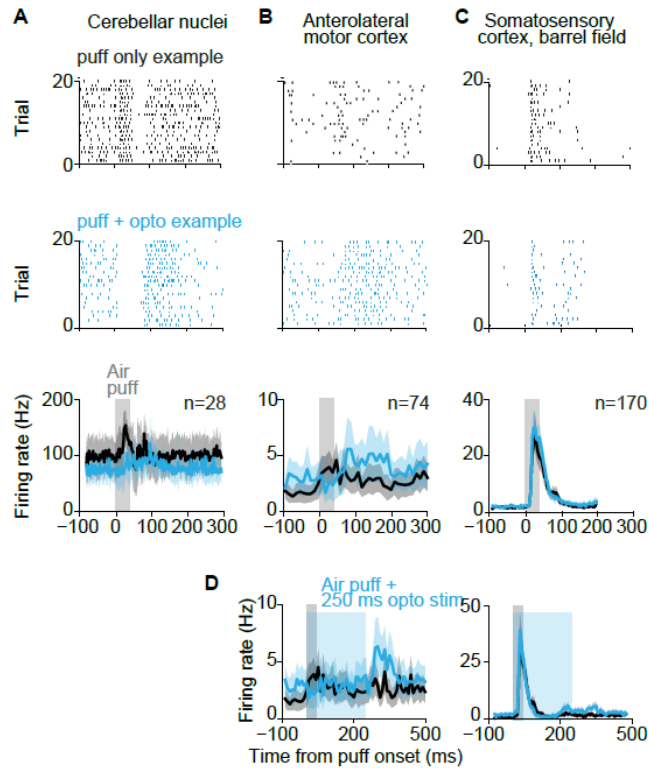

642

643

644

645

646

647

648

649

650

651

652

**Figure S7 Altered responses to whisker puff and cue-locked optogenetic stimulation of Purkinje cells in crus I in cerebellar nuclei and anterolateral motor cortex, but not somatosensory cortex**

(A-C) Example raster plots of cerebellar nuclei cells (A), anterolateral motor cortex (B), and the barrel field of the primary somatosensory cortex (C) during 20 trials with only a whisker puff (top) or with a whisker puff paired with optogenetic stimulation (middle), and average firing rates (bottom) in response to an air puff to the whiskers with or without paired optogenetic stimulation of Purkinje cells. (D) Same as the bottom plots in B and C, but now with a longer duration (250 ms instead of 40 ms) of the optogenetic stimulation. Shaded areas represent 95% confidence intervals.

**Supplementary Table 1 | Mice progress through eight different levels during learning of the evidence-accumulation decision-making task.**

| <b>Level</b>                                   | <b>0</b>               | <b>1</b>                                                 | <b>2</b>                                                 | <b>3</b>                                                 | <b>4</b>                                                 | <b>5</b>                                                | <b>6</b>                                                 | <b>7</b>    |
|------------------------------------------------|------------------------|----------------------------------------------------------|----------------------------------------------------------|----------------------------------------------------------|----------------------------------------------------------|---------------------------------------------------------|----------------------------------------------------------|-------------|
| <b>Audio cue, 1s before cue period onset</b>   | Yes                    | Yes                                                      | Yes                                                      | Yes                                                      | Yes                                                      | Yes                                                     | Yes                                                      | Yes         |
| <b>Bilateral puffs at start</b>                | Yes                    | Yes                                                      | Yes                                                      | Yes                                                      | Yes                                                      | Yes                                                     | Yes                                                      | Yes         |
| <b>Cue period duration (s)</b>                 | 1                      | 1                                                        | 1                                                        | 2.0, 2.8, or 3.8                                         | 3.8, or 1.5                                              | 3.8, or 1.5                                             | 3.8, or 1.5                                              | 3.8, or 1.5 |
| <b>Distractor puffs</b>                        | No                     | No                                                       | No                                                       | No                                                       | No                                                       | No                                                      | Yes, 1:9                                                 | Yes, 1:4    |
| <b>Bilateral puffs at end</b>                  | No                     | No                                                       | Yes                                                      | Yes                                                      | Yes                                                      | Yes                                                     | Yes                                                      | Yes         |
| <b>Delay</b>                                   | 200 ms                 | 200 ms                                                   | 200 ms                                                   | 200 ms                                                   | 500 ms                                                   | 800 ms                                                  | 800 ms                                                   | 800 ms      |
| <b>Guide puffs (2.5 Hz) until animal licks</b> | No                     | Yes                                                      | Yes                                                      | No                                                       | No                                                       | No                                                      | No                                                       | No          |
| <b>Need to lick on correct side for reward</b> | No                     | Yes                                                      | Yes                                                      | Yes                                                      | Yes                                                      | Yes                                                     | Yes                                                      | Yes         |
| <b>Does first lick need to be correct</b>      | No                     | No                                                       | Yes                                                      | Yes                                                      | Yes                                                      | Yes                                                     | Yes                                                      | Yes         |
| <b>Error trials punished</b>                   | No                     | No                                                       | Yes                                                      | Yes                                                      | Yes                                                      | Yes                                                     | Yes                                                      | Yes         |
| <b>Requirements to proceed to next level</b>   | 15 consecutive rewards | at least 100 trials & 55% correct in window of 40 trials | at least 200 trials & 80% correct in window of 50 trials | at least 100 trials & 75% correct in window of 40 trials | at least 100 trials & 80% correct in window of 40 trials | at least 25 trials & 80% correct in window of 24 trials | at least 250 trials & 75% correct in window of 40 trials | N/A         |

## References

- Akrami, A., Kopec, C.D., Diamond, M.E., and Brody, C.D. (2018). Posterior parietal cortex represents sensory history and mediates its effects on behaviour. *Nature* 554, 368–372. <https://doi.org/10.1038/nature25510>.
- Ashwood, Z.C., Roy, N.A., Stone, I.R., Urai, A.E., Churchland, A.K., Pouget, A., and Pillow, J.W. (2022). Mice alternate between discrete strategies during perceptual decision-making. *Nat Neurosci* 25, 201–212. <https://doi.org/10.1038/s41593-021-01007-z>.
- Badura, A., Verpeut, J.L., Metzger, J.W., Pereira, T.D., Pisano, T.J., Deverett, B., Bakshinskaya, D.E., and Wang, S.S.-H. (2018). Normal cognitive and social development require posterior cerebellar activity. *ELife* 7, e36401. <https://doi.org/10.7554/eLife.36401>.
- Bengtsson, F., and Hesslow, G. (2006). Cerebellar control of the inferior olive. *The Cerebellum* 5, 7–14. <https://doi.org/10.1080/14734220500462757>.
- Bolkan, S.S., Stone, I.R., Pinto, L., Ashwood, Z.C., Iravedra Garcia, J.M., Herman, A.L., Singh, P., Bandi, A., Cox, J., Zimmerman, C.A., et al. (2022). Opponent control of behavior by dorsomedial striatal pathways depends on task demands and internal state. *Nat. Neurosci.* 25, 345–357. <https://doi.org/10.1038/s41593-022-01021-9>.
- Calhoun, A.J., Pillow, J.W., and Murthy, M. (2019). Unsupervised identification of the internal states that shape natural behavior. *Nat. Neurosci.* 22, 2040–2049. <https://doi.org/10.1038/s41593-019-0533-x>.
- Carta, I., Chen, C.H., Schott, A.L., Dorizan, S., and Khodakhah, K. (2019). Cerebellar modulation of the reward circuitry and social behavior. *Science* 363. <https://doi.org/10.1126/science.aav0581>.
- Chabrol, F.P., Blot, A., and Mrsic-Flogel, T.D. (2019). Cerebellar contribution to preparatory activity in motor neocortex. *Neuron* 103, 506-519.e4. <https://doi.org/10.1016/j.neuron.2019.05.022>.
- Chen, X., Du, Y., Broussard, G.J., Kislin, M., Yuede, C.M., Zhang, S., Dietmann, S., Gabel, H., Zhao, G., Wang, S.S.-H., et al. (2022). Transcriptomic mapping uncovers Purkinje neuron plasticity driving learning. *Nature* 605, 722–727. <https://doi.org/10.1038/s41586-022-04711-3>.
- Deverett, B., Koay, S.A., Oostland, M., and Wang, S.S.-H. (2018). Cerebellar involvement in an evidence-accumulation decision-making task. *ELife* 7, e36781. <https://doi.org/10.7554/eLife.36781>.
- Deverett, B., Kislin, M., Tank, D.W., and Wang, S.S.-H. (2019). Cerebellar disruption impairs working memory during evidence accumulation. *Nat. Commun.* 10, 3128. <https://doi.org/10.1038/s41467-019-11050-x>.
- Dombeck, D.A., Khabbaz, A.N., Collman, F., Adelman, T.L. & Tank, D.W. (2007) Imaging large scale neural activity with cellular resolution in awake mobile mice. *Neuron* 56, 43–57. <https://doi.org/10.1016/j.neuron.2007.08.003>.



Frosch, I.R., Mittal, V.A., and D’Mello, A.M. (2022). Cerebellar Contributions to Social Cognition in ASD: A Predictive Processing Framework. *Front. Integr. Neurosci.* *16*, 810425. <https://doi.org/10.3389/fnint.2022.810425>.

Fujita, H., Kodama, T., and du Lac, S. (2020). Modular output circuits of the fastigial nucleus for diverse motor and nonmotor functions of the cerebellar vermis. *ELife* *9*, e58613. <https://doi.org/10.7554/eLife.58613>.

Gao, Z., Davis, C., Thomas, A.M., Economo, M.N., Abrego, A.M., Svoboda, K., De Zeeuw, C.I., and Li, N. (2018). A cortico-cerebellar loop for motor planning. *Nature* *563*, 113–116. <https://doi.org/10.1038/s41586-018-0633-x>.

Garfinkle, J., Guo, T., Synnes, A., Chau, V., Branson, H.M., Ufkes, S., Tam, E.W.Y., Grunau, R.E., and Miller, S.P. (2020). Location and size of preterm cerebellar hemorrhage and childhood development. *Ann. Neurol.* *88*, 1095–1108. <https://doi.org/10.1002/ana.25899>.

Happé, F., and Frith, U. (2006). The weak coherence account: detail-focused cognitive style in autism spectrum disorders. *J. Autism Dev. Disord.* *36*, 5–25. <https://doi.org/10.1007/s10803-005-0039-0>.

Hatten, M.E. (2020). Adding cognitive connections to the cerebellum. *Science* *370*, 1411–1412. <https://doi.org/10.1126/science.abf4483>.

Heijden, M.E. van der, Gill, J.S., and Sillitoe, R.V. (2021). Abnormal Cerebellar Development in Autism Spectrum Disorders. *Dev. Neurosci.* *43*, 181–190. <https://doi.org/10.1159/000515189>.

Ito, M. (2006). Cerebellar circuitry as a neuronal machine. *Prog. Neurobiol.* *78*, 272–303. <https://doi.org/10.1016/j.pneurobio.2006.02.006>.

Kelly, E., Meng, F., Fujita, H., Morgado, F., Kazemi, Y., Rice, L.C., Ren, C., Escamilla, C.O., Gibson, J.M., Sajadi, S., et al. (2020). Regulation of autism-relevant behaviors by cerebellar–prefrontal cortical circuits. *Nat. Neurosci.* *23*, 1102–1110. <https://doi.org/10.1038/s41593-020-0665-z>.

Kennerley, S.W., Walton, M.E., Behrens, T.E.J., Buckley, M.J., and Rushworth, M.F.S. (2006). Optimal decision making and the anterior cingulate cortex. *Nat. Neurosci.* *9*, 940–947. <https://doi.org/10.1038/nn1724>.

Kim, O.A., Ohmae, S., and Medina, J.F. (2020). A cerebello-olivary signal for negative prediction error is sufficient to cause extinction of associative motor learning. *Nat. Neurosci.* *23*, 1550–1554. <https://doi.org/10.1038/s41593-020-00732-1>.

Klibaite, U., Kislin, M., Verpeut, J.L., Bergeler, S., Sun, X., Shaevitz, J.W., and Wang, S.S.-H. (2022). Deep phenotyping reveals movement phenotypes in mouse neurodevelopmental models. *Mol Autism* *13*, 12. <https://doi.org/10.1186/s13229-022-00492-8>.

Kloth, A.D., Badura, A., Li, A., Cherskov, A., Connolly, S.G., Giovannucci, A., Bangash, M.A., Grasselli, G., Peñagarikano, O., Piochon, C., et al. (2015). Cerebellar associative sensory learning defects in five mouse autism models. *ELife* *4*, e06085. <https://doi.org/10.7554/eLife.06085>.

Küper, M., and Timmann, D. (2013). Cerebellar mutism. *Brain Lang.* *127*, 327–333.  
<https://doi.org/10.1016/j.bandl.2013.01.001>.

Limperopoulos, C., Bassan, H., Gauvreau, K., Robertson, R.L., Sullivan, N.R., Benson, C.B., Avery, L., Stewart, J., Soul, J.S., Ringer, S.A., et al. (2007). Does cerebellar injury in premature infants contribute to the high prevalence of long-term cognitive, learning, and behavioral disability in survivors? *Pediatrics* *120*, 584–593. <https://doi.org/10.1542/peds.2007-1041>.

Llinas, R. (2014). The olivo-cerebellar system: a key to understanding the functional significance of intrinsic oscillatory brain properties. *Front. Neural Circuits* *7*, 96.  
<https://doi.org/10.3389/fncir.2013.00096>.

Markram, K., and Markram, H. (2010). The intense world theory – a unifying theory of the neurobiology of autism. *Front. Hum. Neurosci.* *4*. <https://doi.org/10.3389/fnhum.2010.00224>.

Mottron, L., Dawson, M., Soulières, I., Hubert, B., and Burack, J. (2006). Enhanced perceptual functioning in autism: an update, and eight principles of autistic perception. *J. Autism Dev. Disord.* *36*, 27–43. <https://doi.org/10.1007/s10803-005-0040-7>.

Pachitariu, M., Steinmetz, N., Kadir, S., Carandini, M., and D, H.K. (2016). Kilosort: realtime spike-sorting for extracellular electrophysiology with hundreds of channels. *BioRxiv* *061481*.  
<https://doi.org/10.1101/061481>.

Pellicano, E., and Burr, D. (2012). When the world becomes “too real”: a Bayesian explanation of autistic perception. *Trends Cogn. Sci.* *16*, 504–510. <https://doi.org/10.1016/j.tics.2012.08.009>.

Pinto, L., Koay, S.A., Engelhard, B., Yoon, A.M., Deverett, B., Thiberge, S.Y., Witten, I.B., Tank, D.W., and Brody, C.D. (2018). An accumulation-of-evidence task using visual pulses for mice navigating in virtual reality. *Front. Behav. Neurosci.* *12*, 36.  
<https://doi.org/10.3389/fnbeh.2018.00036>.

Pisano, T.J., Dhanerawala, Z.M., Kislin, M., Bakshinskaya, D., Engel, E.A., Hansen, E.J., Hoag, A.T., Lee, J., de Oude, N.L., Venkataraju, K.U., et al. (2021). Homologous organization of cerebellar pathways to sensory, motor, and associative forebrain. *Cell Rep.* *36*, 109721.  
<https://doi.org/10.1016/j.celrep.2021.109721>.

Rice, L.C., D’Mello, A.M., and Stoodley, C.J. (2021). Differential Behavioral and Neural Effects of Regional Cerebellar tDCS. *Neuroscience* *462*, 288–302.  
<https://doi.org/10.1016/j.neuroscience.2021.03.008>.

Stoodley, C.J., and Tsai, P.T. (2021). Adaptive Prediction for Social Contexts: The Cerebellar Contribution to Typical and Atypical Social Behaviors. *Annu. Rev. Neurosci.* *44*, 475–493.  
<https://doi.org/10.1146/annurev-neuro-100120-092143>.

Strick, P.L., Dum, R.P., and Fiez, J.A. (2009). Cerebellum and nonmotor function. *Annu. Rev. Neurosci.* *32*, 413–434. <https://doi.org/10.1146/annurev.neuro.31.060407.125606>.

Tsai, P.T., Hull, C., Chu, Y., Greene-Colozzi, E., Sadowski, A.R., Leech, J.M., Steinberg, J., Crawley, J.N., Regehr, W.G., and Sahin, M. (2012). Autistic-like behaviour and cerebellar dysfunction in Purkinje cell Tsc1 mutant mice. *Nature* *488*, 647–651.

<https://doi.org/10.1038/nature11310>.

Tsai, P.T., Rudolph, S., Guo, C., Ellegood, J., Gibson, J.M., Schaeffer, S.M., Mogavero, J., Lerch, J.P., Regehr, W., and Sahin, M. (2018). Sensitive Periods for Cerebellar-Mediated Autistic-like Behaviors. *Cell Rep.* 25, 357–367.e4. <https://doi.org/10.1016/j.celrep.2018.09.039>.

Wagner, M.J., and Luo, L. (2020). Neocortex-cerebellum circuits for cognitive processing. *Trends Neurosci.* 43, 42–54. <https://doi.org/10.1016/j.tins.2019.11.002>.

Wang, S.S.-H., Kloth, A.D., and Badura, A. (2014). The Cerebellum, Sensitive Periods, and Autism. *Neuron* 83, 518–532. <https://doi.org/10.1016/j.neuron.2014.07.016>.

Yamada, T., Yang, Y., Valnegri, P., Juric, I., Abnoui, A., Markwalter, K.H., Guthrie, A.N., Godec, A., Oldenborg, A., Hu, M., et al. (2019). Sensory Experience Remodels Genome Architecture in Neural Circuit to Drive Motor Learning. *Nature* 569, 708–713. <https://doi.org/10.1038/s41586-019-1190-7>.
